# Supplementary material for: Methylglyoxal, Glycated Albumin, PAF, and TNF-α: Possible Inflammatory and Metabolic Biomarkers for Management of Gestational Diabetes
Source: PubMed Central journal article supplement (PMC7071306; doi:10.3390/nu12020479), 2020-02-14
Supplement: nutrients-12-00479-s001.pdf [file nutrients-12-00479-s001.pdf]

**Table S1.** Table of correlation coefficients for all biomarker variables at each time point.

|                                    | <b>Age</b> | <b>Pre-gestational weight</b> | <b>Pre-gestational BMI</b> | <b>Birth weight</b> | <b>Fasting blood glucose T0</b> |
|------------------------------------|------------|-------------------------------|----------------------------|---------------------|---------------------------------|
| <b>Age</b>                         |            | 0.712                         | 0.671                      | 0.597               | 0.349                           |
| <b>Pre-gestational weight</b>      | -0.070     |                               | 0.000                      | 0.003               | 0.195                           |
| <b>Pre-gestational BMI</b>         | -0.081     | 0.863                         |                            | 0.031               | 0.260                           |
| <b>Birth weight</b>                | 0.114      | 0.580                         | 0.441                      |                     | 0.799                           |
| <b>Fasting blood glucose T0</b>    | -0.196     | 0.268                         | 0.234                      | 0.059               |                                 |
| <b>Glycated hemoglobin T0</b>      | 0.090      | 0.141                         | 0.209                      | -0.015              | 0.479                           |
| <b>Insulin T0</b>                  | 0.150      | 0.193                         | 0.279                      | 0.082               | 0.012                           |
| <b>HOMA index T0</b>               | -0.136     | 0.431                         | 0.493                      | -0.024              | 0.331                           |
| <b>Total cholesterol T0</b>        | -0.232     | -0.072                        | -0.099                     | -0.010              | 0.002                           |
| <b>LDL cholesterol T0</b>          | -0.265     | -0.275                        | -0.237                     | -0.134              | -0.028                          |
| <b>HDL cholesterol T0</b>          | -0.068     | 0.156                         | -0.031                     | 0.378               | -0.173                          |
| <b>Triglycerides T0</b>            | 0.025      | 0.198                         | 0.195                      | 0.183               | 0.012                           |
| <b>CRP T0</b>                      | -0.119     | 0.023                         | 0.168                      | 0.053               | -0.065                          |
| <b>Cortisol T0</b>                 | -0.107     | -0.298                        | -0.211                     | -0.225              | -0.097                          |
| <b>BAFF T0</b>                     | -0.205     | -0.268                        | -0.120                     | -0.280              | 0.050                           |
| <b>PAF T0</b>                      | -0.049     | 0.068                         | 0.112                      | -0.293              | 0.259                           |
| <b>TNF-<math>\alpha</math> T0</b>  | 0.033      | -0.047                        | 0.012                      | 0.010               | 0.049                           |
| <b>MG T0</b>                       | -0.190     | 0.400                         | 0.272                      | 0.438               | 0.079                           |
| <b>GA T0</b>                       | -0.226     | 0.388                         | 0.417                      | 0.280               | -0.013                          |
| <b>glic/tot T0</b>                 | -0.221     | 0.372                         | 0.364                      | 0.348               | -0.168                          |
| <b>Fasting blood glucose T12</b>   | -0.372     | 0.055                         | 0.010                      | 0.139               | 0.446                           |
| <b>Glycated hemoglobin T12</b>     | 0.033      | 0.071                         | 0.183                      | 0.049               | 0.580                           |
| <b>Insulin T12</b>                 | 0.012      | 0.051                         | 0.130                      | -0.386              | 0.296                           |
| <b>HOMA index T12</b>              | -0.283     | 0.147                         | 0.312                      | -0.318              | 0.316                           |
| <b>Total cholesterol T12</b>       | -0.080     | -0.378                        | -0.330                     | -0.105              | -0.209                          |
| <b>LDL cholesterol T12</b>         | -0.050     | -0.293                        | -0.229                     | 0.019               | -0.099                          |
| <b>HDL cholesterol T12</b>         | -0.093     | 0.027                         | -0.088                     | 0.222               | -0.082                          |
| <b>Triglycerides T12</b>           | 0.161      | 0.226                         | 0.271                      | 0.299               | 0.056                           |
| <b>CRP T12</b>                     | -0.119     | 0.069                         | 0.034                      | 0.129               | 0.031                           |
| <b>Cortisol T12</b>                | 0.276      | -0.307                        | -0.257                     | -0.313              | -0.033                          |
| <b>BAFF T12</b>                    | -0.067     | 0.100                         | 0.266                      | 0.045               | 0.216                           |
| <b>PAF T12</b>                     | 0.170      | 0.160                         | 0.171                      | -0.092              | 0.150                           |
| <b>TNF-<math>\alpha</math> T12</b> | 0.163      | 0.240                         | 0.296                      | 0.114               | 0.218                           |
| <b>MG T12</b>                      | -0.264     | 0.406                         | 0.301                      | 0.397               | 0.178                           |
| <b>GA T12</b>                      | -0.064     | 0.229                         | -0.020                     | 0.208               | 0.019                           |
| <b>glic/tot T12</b>                | -0.181     | 0.399                         | 0.202                      | 0.372               | -0.163                          |

|                           | Glycated hemoglobin T0 | Insulin T0 | HOMA index T0 | Total cholesterol T0 | LDL cholesterol T0 |
|---------------------------|------------------------|------------|---------------|----------------------|--------------------|
| Age                       | 0.635                  | 0.430      | 0.527         | 0.218                | 0.156              |
| Pre-gestational weight    | 0.457                  | 0.307      | 0.036         | 0.704                | 0.141              |
| Pre-gestational BMI       | 0.269                  | 0.135      | 0.014         | 0.601                | 0.207              |
| Birth weight              | 0.945                  | 0.702      | 0.920         | 0.963                | 0.534              |
| Fasting blood glucose T0  | 0.016                  | 0.953      | 0.115         | 0.994                | 0.893              |
| Glycated hemoglobin T0    |                        | 0.024      | 0.096         | 0.910                | 0.927              |
| Insulin T0                | 0.412                  |            | 0.000         | 0.482                | 0.709              |
| HOMA index T0             | 0.348                  | 0.970      |               | 0.224                | 0.558              |
| Total cholesterol T0      | -0.022                 | 0.133      | 0.258         |                      | 0.000              |
| LDL cholesterol T0        | -0.017                 | 0.071      | 0.126         | 0.892                |                    |
| HDL cholesterol T0        | -0.414                 | -0.250     | -0.178        | 0.433                | 0.197              |
| Triglycerides T0          | 0.231                  | 0.225      | 0.298         | 0.253                | 0.091              |
| CRP T0                    | 0.115                  | 0.329      | 0.533         | 0.337                | 0.361              |
| Cortisol T0               | -0.173                 | -0.264     | -0.286        | 0.250                | 0.354              |
| BAFF T0                   | -0.049                 | 0.032      | -0.004        | 0.239                | 0.300              |
| PAF T0                    | 0.394                  | 0.197      | 0.479         | -0.058               | -0.034             |
| TNF- $\alpha$ T0          | -0.173                 | 0.072      | 0.164         | 0.084                | 0.081              |
| MG T0                     | 0.401                  | 0.338      | 0.440         | 0.330                | 0.283              |
| GA T0                     | -0.207                 | -0.043     | 0.140         | 0.156                | -0.030             |
| glic/tot T0               | -0.204                 | -0.005     | 0.056         | 0.149                | -0.025             |
| Fasting blood glucose T12 | 0.161                  | 0.100      | 0.287         | -0.098               | -0.181             |
| Glycated hemoglobin T12   | 0.746                  | 0.322      | 0.289         | 0.086                | 0.107              |
| Insulin T12               | 0.384                  | 0.486      | 0.774         | 0.107                | -0.017             |
| HOMA index T12            | 0.254                  | 0.400      | 0.768         | 0.304                | 0.247              |
| Total cholesterol T12     | -0.146                 | 0.029      | -0.106        | 0.822                | 0.821              |
| LDL cholesterol T12       | 0.014                  | 0.149      | 0.000         | 0.758                | 0.872              |
| HDL cholesterol T12       | -0.462                 | -0.088     | -0.121        | 0.271                | 0.167              |
| Triglycerides T12         | 0.038                  | 0.006      | 0.017         | 0.094                | -0.071             |
| CRP T12                   | -0.137                 | -0.179     | -0.078        | 0.282                | 0.186              |
| Cortisol T12              | -0.010                 | -0.391     | -0.447        | -0.136               | 0.075              |
| BAFF T12                  | 0.047                  | 0.020      | -0.082        | 0.132                | 0.100              |
| PAF T12                   | 0.364                  | 0.291      | 0.422         | -0.072               | -0.118             |
| TNF- $\alpha$ T12         | -0.076                 | 0.032      | 0.119         | 0.172                | 0.102              |
| MG T12                    | 0.458                  | 0.273      | 0.220         | 0.390                | 0.319              |
| GA T12                    | -0.538                 | -0.388     | -0.164        | 0.112                | 0.083              |
| glic/tot T12              | -0.442                 | -0.178     | -0.135        | 0.120                | 0.017              |

|                           | HDL cholesterol T0 | Triglycerides T0 | CRP T0 | Cortisol T0 | BAFF T0 |
|---------------------------|--------------------|------------------|--------|-------------|---------|
| Age                       | 0.720              | 0.894            | 0.532  | 0.572       | 0.276   |
| Pre-gestational weight    | 0.412              | 0.294            | 0.902  | 0.110       | 0.152   |
| Pre-gestational BMI       | 0.873              | 0.302            | 0.376  | 0.262       | 0.528   |
| Birth weight              | 0.069              | 0.391            | 0.805  | 0.290       | 0.185   |
| Fasting blood glucose T0  | 0.407              | 0.955            | 0.758  | 0.644       | 0.811   |
| Glycated hemoglobin T0    | 0.023              | 0.219            | 0.546  | 0.362       | 0.797   |
| Insulin T0                | 0.182              | 0.232            | 0.076  | 0.158       | 0.868   |
| HOMA index T0             | 0.404              | 0.157            | 0.007  | 0.176       | 0.986   |
| Total cholesterol T0      | 0.017              | 0.177            | 0.068  | 0.182       | 0.204   |
| LDL cholesterol T0        | 0.297              | 0.634            | 0.050  | 0.055       | 0.107   |
| HDL cholesterol T0        |                    | 0.145            | 0.260  | 0.050       | 0.497   |
| Triglycerides T0          | -0.272             |                  | 0.005  | 0.002       | 0.097   |
| CRP T0                    | -0.212             | 0.502            |        | 0.140       | 0.381   |
| Cortisol T0               | 0.361              | -0.536           | -0.276 |             | 0.931   |
| BAFF T0                   | -0.129             | 0.309            | 0.166  | 0.016       |         |
| PAF T0                    | -0.498             | 0.344            | 0.327  | -0.360      | 0.094   |
| TNF- $\alpha$ T0          | -0.261             | 0.182            | 0.205  | -0.296      | -0.097  |
| MG T0                     | 0.016              | 0.336            | 0.292  | -0.015      | 0.075   |
| GA T0                     | 0.389              | 0.091            | 0.198  | 0.052       | 0.102   |
| glic/tot T0               | 0.342              | 0.183            | 0.190  | 0.006       | 0.150   |
| Fasting blood glucose T12 | -0.299             | 0.294            | 0.326  | -0.272      | -0.015  |
| Glycated hemoglobin T12   | -0.355             | 0.272            | 0.078  | -0.149      | 0.119   |
| Insulin T12               | -0.387             | 0.452            | 0.157  | -0.284      | 0.307   |
| HOMA index T12            | -0.204             | 0.426            | 0.497  | 0.027       | 0.357   |
| Total cholesterol T12     | 0.392              | -0.014           | 0.252  | 0.397       | 0.176   |
| LDL cholesterol T12       | 0.217              | -0.076           | 0.342  | 0.414       | 0.123   |
| HDL cholesterol T12       | 0.815              | -0.563           | -0.228 | 0.384       | -0.105  |
| Triglycerides T12         | -0.126             | 0.730            | 0.153  | -0.458      | 0.152   |
| CRP T12                   | 0.125              | 0.331            | 0.283  | -0.373      | 0.161   |
| Cortisol T12              | 0.099              | -0.563           | -0.473 | 0.647       | 0.185   |
| BAFF T12                  | 0.018              | 0.175            | 0.014  | 0.019       | 0.704   |
| PAF T12                   | -0.368             | 0.350            | 0.182  | -0.370      | 0.154   |
| TNF- $\alpha$ T12         | -0.148             | 0.277            | 0.254  | -0.402      | 0.010   |
| MG T12                    | 0.170              | 0.156            | 0.033  | 0.118       | 0.125   |
| GA T12                    | 0.312              | 0.054            | -0.058 | -0.016      | 0.050   |
| glic/tot T12              | 0.435              | 0.150            | -0.026 | -0.084      | 0.135   |

|                           | PAF T0 | TNF- $\alpha$ T0 | MG T0  | GA T0  | glic/tot T0 |
|---------------------------|--------|------------------|--------|--------|-------------|
| Age                       | 0.799  | 0.864            | 0.314  | 0.238  | 0.250       |
| Pre-gestational weight    | 0.723  | 0.806            | 0.028  | 0.037  | 0.047       |
| Pre-gestational BMI       | 0.555  | 0.948            | 0.146  | 0.024  | 0.052       |
| Birth weight              | 0.165  | 0.965            | 0.032  | 0.196  | 0.104       |
| Fasting blood glucose T0  | 0.211  | 0.815            | 0.708  | 0.953  | 0.434       |
| Glycated hemoglobin T0    | 0.031  | 0.362            | 0.028  | 0.281  | 0.289       |
| Insulin T0                | 0.296  | 0.707            | 0.067  | 0.825  | 0.978       |
| HOMA index T0             | 0.018  | 0.443            | 0.031  | 0.524  | 0.800       |
| Total cholesterol T0      | 0.762  | 0.658            | 0.075  | 0.420  | 0.442       |
| LDL cholesterol T0        | 0.860  | 0.670            | 0.129  | 0.876  | 0.896       |
| HDL cholesterol T0        | 0.005  | 0.164            | 0.933  | 0.037  | 0.069       |
| Triglycerides T0          | 0.063  | 0.336            | 0.070  | 0.637  | 0.341       |
| CRP T0                    | 0.077  | 0.277            | 0.118  | 0.303  | 0.324       |
| Cortisol T0               | 0.051  | 0.112            | 0.936  | 0.790  | 0.977       |
| BAFF T0                   | 0.620  | 0.610            | 0.695  | 0.599  | 0.436       |
| PAF T0                    |        | 0.818            | 0.708  | 0.690  | 0.610       |
| TNF- $\alpha$ T0          | 0.044  |                  | 0.321  | 0.237  | 0.086       |
| MG T0                     | 0.071  | -0.188           |        | 0.717  | 0.898       |
| GA T0                     | 0.077  | -0.227           | -0.070 |        | 0.000       |
| glic/tot T0               | 0.099  | -0.325           | 0.025  | 0.940  |             |
| Fasting blood glucose T12 | 0.109  | 0.168            | 0.186  | -0.032 | -0.050      |
| Glycated hemoglobin T12   | 0.295  | 0.124            | 0.074  | -0.103 | -0.170      |
| Insulin T12               | 0.401  | 0.227            | -0.028 | 0.051  | -0.033      |
| HOMA index T12            | 0.277  | -0.056           | 0.233  | 0.296  | 0.197       |
| Total cholesterol T12     | -0.244 | 0.208            | -0.009 | 0.029  | -0.008      |
| LDL cholesterol T12       | -0.177 | 0.308            | 0.151  | -0.031 | -0.138      |
| HDL cholesterol T12       | -0.580 | -0.288           | -0.010 | 0.267  | 0.196       |
| Triglycerides T12         | 0.250  | 0.348            | -0.048 | 0.260  | 0.372       |
| CRP T12                   | 0.101  | 0.081            | -0.086 | 0.090  | 0.015       |
| Cortisol T12              | -0.277 | -0.434           | -0.176 | -0.243 | -0.345      |
| BAFF T12                  | -0.076 | 0.048            | -0.125 | 0.234  | 0.208       |
| PAF T12                   | 0.756  | -0.014           | 0.101  | 0.118  | 0.175       |
| TNF- $\alpha$ T12         | 0.193  | 0.542            | -0.241 | 0.211  | 0.148       |
| MG T12                    | 0.026  | -0.331           | 0.824  | -0.029 | 0.095       |
| GA T12                    | 0.102  | -0.151           | 0.078  | 0.216  | 0.272       |
| glic/tot T12              | -0.014 | -0.372           | 0.115  | 0.454  | 0.604       |

|                           | Fasting blood glucose T12 | Glycated hemoglobin T12 | Insulin T12 | HOMA index 12 | Total cholesterol T12 |
|---------------------------|---------------------------|-------------------------|-------------|---------------|-----------------------|
| Age                       | 0.097                     | 0.871                   | 0.954       | 0.170         | 0.703                 |
| Pre-gestational weight    | 0.814                     | 0.730                   | 0.810       | 0.482         | 0.062                 |
| Pre-gestational BMI       | 0.965                     | 0.370                   | 0.537       | 0.129         | 0.107                 |
| Birth weight              | 0.571                     | 0.821                   | 0.069       | 0.185         | 0.634                 |
| Fasting blood glucose T0  | 0.049                     | 0.005                   | 0.192       | 0.142         | 0.362                 |
| Glycated hemoglobin T0    | 0.485                     | 0.000                   | 0.058       | 0.221         | 0.487                 |
| Insulin T0                | 0.667                     | 0.108                   | 0.014       | 0.047         | 0.890                 |
| HOMA index T0             | 0.233                     | 0.203                   | 0.000       | 0.000         | 0.656                 |
| Total cholesterol T0      | 0.674                     | 0.678                   | 0.612       | 0.139         | 0.000                 |
| LDL cholesterol T0        | 0.433                     | 0.604                   | 0.935       | 0.234         | 0.000                 |
| HDL cholesterol T0        | 0.188                     | 0.075                   | 0.056       | 0.329         | 0.053                 |
| Triglycerides T0          | 0.196                     | 0.178                   | 0.023       | 0.034         | 0.948                 |
| CRP T0                    | 0.150                     | 0.706                   | 0.452       | 0.011         | 0.225                 |
| Cortisol T0               | 0.232                     | 0.467                   | 0.169       | 0.900         | 0.049                 |
| BAFF T0                   | 0.950                     | 0.563                   | 0.136       | 0.080         | 0.400                 |
| PAF T0                    | 0.637                     | 0.143                   | 0.047       | 0.181         | 0.240                 |
| TNF- $\alpha$ T0          | 0.466                     | 0.545                   | 0.275       | 0.789         | 0.319                 |
| MG T0                     | 0.420                     | 0.719                   | 0.893       | 0.262         | 0.965                 |
| GA T0                     | 0.895                     | 0.625                   | 0.812       | 0.160         | 0.894                 |
| glic/tot T0               | 0.834                     | 0.416                   | 0.879       | 0.356         | 0.969                 |
| Fasting blood glucose T12 |                           | 0.536                   | 0.408       | 0.083         | 0.131                 |
| Glycated hemoglobin T12   | 0.143                     |                         | 0.003       | 0.011         | 0.723                 |
| Insulin T12               | 0.191                     | 0.563                   |             | 0.000         | 0.791                 |
| HOMA index T12            | 0.387                     | 0.541                   | 0.959       |               | 0.579                 |
| Total cholesterol T12     | -0.340                    | 0.075                   | -0.056      | -0.129        |                       |
| LDL cholesterol T12       | -0.276                    | 0.216                   | -0.087      | -0.027        | 0.942                 |
| HDL cholesterol T12       | -0.263                    | -0.433                  | -0.488      | -0.453        | 0.345                 |
| Triglycerides T12         | 0.034                     | 0.339                   | 0.316       | 0.196         | -0.021                |
| CRP T12                   | 0.155                     | -0.005                  | 0.074       | 0.118         | 0.253                 |
| Cortisol T12              | -0.407                    | -0.123                  | -0.210      | -0.190        | 0.111                 |
| BAFF T12                  | -0.126                    | 0.449                   | 0.272       | 0.259         | 0.150                 |
| PAF T12                   | 0.096                     | 0.357                   | 0.521       | 0.237         | -0.268                |
| TNF- $\alpha$ T12         | 0.083                     | 0.209                   | 0.177       | 0.067         | 0.277                 |
| MG T12                    | -0.066                    | 0.175                   | -0.142      | 0.091         | 0.131                 |
| GA T12                    | -0.067                    | -0.603                  | -0.442      | -0.262        | -0.015                |
| glic/tot T12              | -0.153                    | -0.458                  | -0.314      | -0.165        | -0.027                |

|                           | LDL cholesterol T12 | HDL cholesterol T12 | Triglycerides T12 | CRP T12 | Cortisol T12 |
|---------------------------|---------------------|---------------------|-------------------|---------|--------------|
| Age                       | 0.822               | 0.659               | 0.441             | 0.571   | 0.182        |
| Pre-gestational weight    | 0.175               | 0.899               | 0.277             | 0.742   | 0.136        |
| Pre-gestational BMI       | 0.294               | 0.675               | 0.189             | 0.872   | 0.215        |
| Birth weight              | 0.935               | 0.308               | 0.166             | 0.559   | 0.146        |
| Fasting blood glucose T0  | 0.670               | 0.724               | 0.810             | 0.893   | 0.889        |
| Glycated hemoglobin T0    | 0.949               | 0.020               | 0.856             | 0.513   | 0.960        |
| Insulin T0                | 0.497               | 0.674               | 0.977             | 0.392   | 0.053        |
| HOMA index T0             | 0.999               | 0.612               | 0.942             | 0.743   | 0.048        |
| Total cholesterol T0      | 0.000               | 0.190               | 0.653             | 0.172   | 0.517        |
| LDL cholesterol T0        | 0.000               | 0.424               | 0.736             | 0.373   | 0.720        |
| HDL cholesterol T0        | 0.319               | 0.000               | 0.548             | 0.551   | 0.638        |
| Triglycerides T0          | 0.731               | 0.003               | 0.000             | 0.106   | 0.003        |
| CRP T0                    | 0.110               | 0.273               | 0.465             | 0.170   | 0.017        |
| Cortisol T0               | 0.050               | 0.058               | 0.021             | 0.066   | 0.000        |
| BAFF T0                   | 0.576               | 0.617               | 0.468             | 0.442   | 0.377        |
| PAF T0                    | 0.420               | 0.002               | 0.227             | 0.630   | 0.180        |
| TNF- $\alpha$ T0          | 0.153               | 0.162               | 0.088             | 0.700   | 0.030        |
| MG T0                     | 0.491               | 0.964               | 0.821             | 0.683   | 0.400        |
| GA T0                     | 0.893               | 0.207               | 0.220             | 0.676   | 0.252        |
| glic/tot T0               | 0.540               | 0.358               | 0.074             | 0.943   | 0.098        |
| Fasting blood glucose T12 | 0.226               | 0.250               | 0.882             | 0.503   | 0.067        |
| Glycated hemoglobin T12   | 0.323               | 0.030               | 0.098             | 0.982   | 0.557        |
| Insulin T12               | 0.692               | 0.013               | 0.124             | 0.726   | 0.313        |
| HOMA index T12            | 0.907               | 0.039               | 0.396             | 0.610   | 0.410        |
| Total cholesterol T12     | 0.000               | 0.091               | 0.920             | 0.223   | 0.598        |
| LDL cholesterol T12       |                     | 0.273               | 0.531             | 0.363   | 0.329        |
| HDL cholesterol T12       | 0.238               |                     | 0.011             | 0.739   | 0.385        |
| Triglycerides T12         | -0.138              | -0.498              |                   | 0.535   | 0.019        |
| CRP T12                   | 0.199               | -0.070              | 0.130             |         | 0.726        |
| Cortisol T12              | 0.213               | 0.182               | -0.467            | -0.074  |              |
| BAFF T12                  | 0.117               | -0.051              | 0.286             | 0.140   | 0.109        |
| PAF T12                   | -0.297              | -0.593              | 0.373             | 0.180   | -0.261       |
| TNF- $\alpha$ T12         | 0.293               | -0.233              | 0.491             | 0.474   | -0.308       |
| MG T12                    | 0.193               | 0.191               | -0.070            | -0.081  | -0.080       |
| GA T12                    | -0.096              | 0.266               | 0.064             | 0.332   | -0.084       |
| glic/tot T12              | -0.179              | 0.270               | 0.215             | 0.323   | -0.215       |

|                           | BAFF T12 | PAF T12 | TNF- $\alpha$ T12 | MG T12 | GA T12 |
|---------------------------|----------|---------|-------------------|--------|--------|
| Age                       | 0.822    | 0.659   | 0.441             | 0.571  | 0.182  |
| Pre-gestational weight    | 0.175    | 0.899   | 0.277             | 0.742  | 0.136  |
| Pre-gestational BMI       | 0.294    | 0.675   | 0.189             | 0.872  | 0.215  |
| Birth weight              | 0.935    | 0.308   | 0.166             | 0.559  | 0.146  |
| Fasting blood glucose T0  | 0.670    | 0.724   | 0.810             | 0.893  | 0.889  |
| Glycated hemoglobin T0    | 0.949    | 0.020   | 0.856             | 0.513  | 0.960  |
| Insulin T0                | 0.497    | 0.674   | 0.977             | 0.392  | 0.053  |
| HOMA index T0             | 0.999    | 0.612   | 0.942             | 0.743  | 0.048  |
| Total cholesterol T0      | 0.000    | 0.190   | 0.653             | 0.172  | 0.517  |
| LDL cholesterol T0        | 0.000    | 0.424   | 0.736             | 0.373  | 0.720  |
| HDL cholesterol T0        | 0.319    | 0.000   | 0.548             | 0.551  | 0.638  |
| Triglycerides T0          | 0.731    | 0.003   | 0.000             | 0.106  | 0.003  |
| CRP T0                    | 0.110    | 0.273   | 0.465             | 0.170  | 0.017  |
| Cortisol T0               | 0.050    | 0.058   | 0.021             | 0.066  | 0.000  |
| BAFF T0                   | 0.576    | 0.617   | 0.468             | 0.442  | 0.377  |
| PAF T0                    | 0.420    | 0.002   | 0.227             | 0.630  | 0.180  |
| TNF- $\alpha$ T0          | 0.153    | 0.162   | 0.088             | 0.700  | 0.030  |
| MG T0                     | 0.491    | 0.964   | 0.821             | 0.683  | 0.400  |
| GA T0                     | 0.893    | 0.207   | 0.220             | 0.676  | 0.252  |
| glic/tot T0               | 0.540    | 0.358   | 0.074             | 0.943  | 0.098  |
| Fasting blood glucose T12 | 0.226    | 0.250   | 0.882             | 0.503  | 0.067  |
| Glycated hemoglobin T12   | 0.323    | 0.030   | 0.098             | 0.982  | 0.557  |
| Insulin T12               | 0.692    | 0.013   | 0.124             | 0.726  | 0.313  |
| HOMA index T12            | 0.907    | 0.039   | 0.396             | 0.610  | 0.410  |
| Total cholesterol T12     | 0.000    | 0.091   | 0.920             | 0.223  | 0.598  |
| LDL cholesterol T12       |          | 0.273   | 0.531             | 0.363  | 0.329  |
| HDL cholesterol T12       | 0.238    |         | 0.011             | 0.739  | 0.385  |
| Triglycerides T12         | -0.138   | -0.498  |                   | 0.535  | 0.019  |
| CRP T12                   | 0.199    | -0.070  | 0.130             |        | 0.726  |
| Cortisol T12              | 0.213    | 0.182   | -0.467            | -0.074 |        |
| BAFF T12                  | 0.117    | -0.051  | 0.286             | 0.140  | 0.109  |
| PAF T12                   | -0.297   | -0.593  | 0.373             | 0.180  | -0.261 |
| TNF- $\alpha$ T12         | 0.293    | -0.233  | 0.491             | 0.474  | -0.308 |
| MG T12                    | 0.193    | 0.191   | -0.070            | -0.081 | -0.080 |
| GA T12                    | -0.096   | 0.266   | 0.064             | 0.332  | -0.084 |
| glic/tot T12              | -0.179   | 0.270   | 0.215             | 0.323  | -0.215 |

|                                    | glic/tot T12 |
|------------------------------------|--------------|
| <b>Age</b>                         | 0.338        |
| <b>Pre-gestational weight</b>      | 0.029        |
| <b>Pre-gestational BMI</b>         | 0.284        |
| <b>Birth weight</b>                | 0.074        |
| <b>Fasting blood glucose T0</b>    | 0.437        |
| <b>Glycated hemoglobin T0</b>      | 0.014        |
| <b>Insulin T0</b>                  | 0.345        |
| <b>HOMA index T0</b>               | 0.530        |
| <b>Total cholesterol T0</b>        | 0.528        |
| <b>LDL cholesterol T0</b>          | 0.929        |
| <b>HDL cholesterol T0</b>          | 0.016        |
| <b>Triglycerides T0</b>            | 0.429        |
| <b>CRP T0</b>                      | 0.892        |
| <b>Cortisol T0</b>                 | 0.658        |
| <b>BAFF T0</b>                     | 0.477        |
| <b>PAF T0</b>                      | 0.942        |
| <b>TNF-<math>\alpha</math> T0</b>  | 0.043        |
| <b>MG T0</b>                       | 0.546        |
| <b>GA T0</b>                       | 0.013        |
| <b>glic/tot T0</b>                 | 0.001        |
| <b>Fasting blood glucose T12</b>   | 0.508        |
| <b>Glycated hemoglobin T12</b>     | 0.019        |
| <b>Insulin T12</b>                 | 0.126        |
| <b>HOMA index T12</b>              | 0.429        |
| <b>Total cholesterol T12</b>       | 0.897        |
| <b>LDL cholesterol T12</b>         | 0.413        |
| <b>HDL cholesterol T12</b>         | 0.192        |
| <b>Triglycerides T12</b>           | 0.303        |
| <b>CRP T12</b>                     | 0.115        |
| <b>Cortisol T12</b>                | 0.302        |
| <b>BAFF T12</b>                    | 0.562        |
| <b>PAF T12</b>                     | 0.409        |
| <b>TNF-<math>\alpha</math> T12</b> | 0.794        |
| <b>MG T12</b>                      | 0.295        |
| <b>GA T12</b>                      | 0.000        |
| <b>glic/tot T12</b>                |              |



In the upper part of the table, we reported p-value, while in the lower part of the table, we reported R-value. HOMA index, homeostatic model assessment index; HDL cholesterol, high-density lipoprotein cholesterol; LDL cholesterol, low-density lipoprotein cholesterol; CRP, C-reactive protein.
